# Supplementary material
Source: publisher figshare collection journal article supplement (https://karger.figshare.com/ndownloader/files/27775266)
Supplement: Supplementary file 1 [file 27775266]

**Supplementary Table 5: Area under the receiver operator characteristic curve (AUROC) values for imaging/ biochemical parameters in the prediction of somatotropinoma granulation status and biochemical remission post-surgical resection**

SI= signal intensity; TSS= trans-sphenoidal surgery

| **Quantitative MR/ Biochemical**  **parameter** | **AUROC**  **(95% confidence interval)** | |
| --- | --- | --- |
| **Densely/intermediate vs Sparsely GH (n=38)** | **Biochemical remission post TSS (n=38)** |
| **Tumour volume (cm3)** | 0.83  (0.61 – 0.99) | 0.80  (0.64 – 0.97) |
| **Knosp Grade** | 0.80  (0.59 – 0.99) | 0.79  (0.62 – 0.95) |
| **Qualitative T2W SI**  **(hyper/hypointense)** | 0.89  (0.81 – 0.96) | 0.54  (0.36 – 0.71) |
| **Tumour/WM**  **T2W SI ratio** | 0.87  (0.75 – 0.99) | 0.62  ( 0.42 0.82) |
| **Tumour/WM**  **T1W SI ratio** | 0.74  (0.55 – 0.93) | 0.73  (0.57 – 0.89) |
| **Tumour/CSF**  **T2W SI ratio** | 0.94  (0.85 – 0.99) | 0.51  (0.30 – 0.72) |
| **Tumour/CSF**  **T1W SI ratio** | 0.72  (0.49 – 0.94) | 0.63  (0.42 – 0.83) |
| **Tumour T2/T1**  **SIRatio - WM** | 0.89  (0.78 – 1.00) | 0.69  (0.51 – 0.86) |
| **Tumour T2/T1**  **SIRatio - CSF** | 0.95  (0.88 – 1.00) | 0.56  (0.34 – 0.78) |
| **Pre - treatment IGF1 (% ULN)** | 0.73  (0.54 – 0.92) | 0.63  (0.45 -0.81) |
| **Pre - treatment growth hormone**  **nadir (mcg/L)** | 0.51  (0.30 – 0.71) | 0.65  (0.45 – 0.84) |
